# Supplementary material
Source: publisher figshare collection journal article supplement (https://sage.figshare.com/ndownloader/files/15264272)
Supplement: Supplementary file 1 [file 15264272]

## Appendix A

Foot and Ankle Ability Measure (FAAM) score.

### Foot and Ankle Ability Measure (FAAM)

#### Activities of Daily Living Subscale

Please answer **every question** with **one response** that most closely describes your condition within the past week.

If the activity in question is limited by something other than your foot or ankle, mark “Not Applicable” (N/A).

|                                      | No<br>Difficulty         | Slight<br>Difficulty     | Moderate<br>Difficulty   | Extreme<br>Difficulty    | Unable<br>to Do          | N/A                      |
|--------------------------------------|--------------------------|--------------------------|--------------------------|--------------------------|--------------------------|--------------------------|
| Standing                             | <input type="checkbox"/> |
| Walking on even ground               | <input type="checkbox"/> |
| Walking on even ground without shoes | <input type="checkbox"/> |
| Walking up hills                     | <input type="checkbox"/> |
| Walking down hills                   | <input type="checkbox"/> |
| Going up stairs                      | <input type="checkbox"/> |
| Going down stairs                    | <input type="checkbox"/> |
| Walking on uneven ground             | <input type="checkbox"/> |
| Stepping up and down curbs           | <input type="checkbox"/> |
| Squatting                            | <input type="checkbox"/> |
| Coming up on your toes               | <input type="checkbox"/> |
| Walking initially                    | <input type="checkbox"/> |
| Walking 5 minutes or less            | <input type="checkbox"/> |
| Walking approximately 10 minutes     | <input type="checkbox"/> |
| Walking 15 minutes or greater        | <input type="checkbox"/> |

### Foot and Ankle Ability Measure (FAAM)

#### Activities of Daily Living Subscale

#### Page 2

Because of your foot and ankle how much difficulty do you have with:

|                                               | No Difficulty<br>at All  | Slight<br>Difficulty     | Moderate<br>Difficulty   | Extreme<br>Difficulty    | Unable to<br>Do          | N/A                      |
|-----------------------------------------------|--------------------------|--------------------------|--------------------------|--------------------------|--------------------------|--------------------------|
| Home responsibilities                         | <input type="checkbox"/> |
| Activities of daily living                    | <input type="checkbox"/> |
| Personal care                                 | <input type="checkbox"/> |
| Light to moderate work (standing, walking)    | <input type="checkbox"/> |
| Heavy work (push/pulling, climbing, carrying) | <input type="checkbox"/> |
| Recreational activities                       | <input type="checkbox"/> |

How would you rate your current level of function during your usual activities of daily living from 0 to 100, with 100 being your level of function prior to your foot or ankle problem and 0 being the inability to perform any of your usual daily activities.

\_\_\_\_ . 0 %

**Foot and Ankle Ability Measure (FAAM)****Sports Subscale**

Because of your foot and ankle how much difficulty do you have with:

|                                                                  | No Difficulty<br>at All  | Slight<br>Difficulty     | Moderate<br>Difficulty   | Extreme<br>Difficulty    | Unable<br>to Do          | N/A                      |
|------------------------------------------------------------------|--------------------------|--------------------------|--------------------------|--------------------------|--------------------------|--------------------------|
| Running                                                          | <input type="checkbox"/> |
| Jumping                                                          | <input type="checkbox"/> |
| Landing                                                          | <input type="checkbox"/> |
| Starting and stopping quickly                                    | <input type="checkbox"/> |
| Cutting/lateral movements                                        | <input type="checkbox"/> |
| Ability to perform activity with your normal technique           | <input type="checkbox"/> |
| Ability to participate in your desired sport as long as you like | <input type="checkbox"/> |

How would you rate your current level of function during your sports related activities from 0 to 100, with 100 being your level of function prior to your foot or ankle problem and 0 being the inability to perform any of your usual daily activities?  
 \_\_\_\_\_. 0%

Overall, how would you rate your current level of function?

☐Normal    ☐Nearly Normal    ☐Abnormal    ☐Severely Abnormal
